# Supplementary material for: “Test and not treat” for onchocerciasis control in a Loa loa endemic area
Source: PubMed Central journal article supplement (PMC5629452; doi:10.1056/nejmoa1705026), 2017-11-08
Supplement: NEJMoa1705026_Pion_SuppApp.pdf [file NEJMoa1705026_Pion_SuppApp.pdf]

## Supplementary Appendix

This appendix has been provided by the authors to give readers additional information about their work.

Supplement to: Kamgno et al. **“Test and not treat” for onchocerciasis control in a *Loa loa* endemic area**

### Supplementary Appendix, Table of Contents for Supplement Materials

- 1) Table S1. Individuals examined and treated and number of AEs per village by health area
- 2) Figure S1. Principle of use and output of LoaScope
- 3) Figure S2. Location of the 92 villages included in the TaNT survey with Ov16 IgG4 prevalence
- 4) Figure S3. Timeline of the Test and treat strategy
- 5) Figure S4. Individual card given to all participants
- 6) Figure S5. Standardized form to record all adverse events following ivermectin treatment
- 7) Figure S6. Number of excluded individuals in each village, classified by cause of exclusion
- 8) Movie S1. Link to a movie of the process from introduction of the capillary to the result
- 9) Supplementary Methods

Table S1. Individuals examined and treated and number of AEs per village by health area

| Health area | Village      | No. Exam | Loa microfilaremia (%) | Ov16 (%) | No. AEs |
|-------------|--------------|----------|------------------------|----------|---------|
| Ekekam III  | Bidzinguele  | 23       | 30.4                   | 21.7     | 0       |
| Ekekam III  | Ekekam III   | 138      | 27.5                   | 18.5     | 23      |
| Ekekam III  | Essakoss     | 33       | 21.2                   | 15.6     | 1       |
| Ekekam III  | Eyang        | 104      | 22.1                   | 19.4     | 6       |
| Ekekam III  | Ngoas        | 132      | 27.3                   | 26.6     | 25      |
| Ekekam III  | Nkolbiyen    | 66       | 25.8                   | 14.1     | 0       |
| Ekekam III  | Nkolbot      | 44       | 27.3                   | 9.1      | 2       |
| Ekekam III  | Nkolfoundi   | 72       | 27.8                   | 38.6     | 10      |
| Ekekam III  | Nkolmelen    | 21       | 33.3                   | 23.8     | 5       |
| Ekekam III  | Nkolmeyang   | 132      | 20.5                   | 18.0     | 9       |
| Ekekam III  | Nkolomang I  | 29       | 20.7                   | 10.3     | 2       |
| Ekekam III  | Nkolomang II | 39       | 25.6                   | 17.9     | 0       |
| Ekekam III  | Nkonmesse    | 110      | 26.4                   | 22.7     | 6       |
| Ekekam III  | Otou Ngonono | 28       | 14.3                   | 22.2     | 1       |
| Ekekam III  | Ozasingui    | 56       | 33.9                   | 32.1     | 7       |
| Ekekam III  | Ozom I       | 237      | 8.0                    | 12.5     | 2       |
| Ekekam III  | Ozom II      | 185      | 25.9                   | 14.0     | 13      |
| Ekekam III  | Ozom III     | 53       | 30.2                   | 13.7     | 10      |
| Ekekam III  | Qbam         | 56       | 17.9                   | 18.2     | 10      |
| Lobo        | Akok         | 117      | 15.4                   | 33.3     | 4       |
| Lobo        | Elig Abode   | 99       | 19.2                   | 35.1     | 18      |
| Lobo        | Koudi        | 172      | 30.2                   | 28.8     | 6       |
| Lobo        | Lobo         | 406      | 15.8                   | 30.7     | 31      |
| Lobo        | Menguek I    | 88       | 21.6                   | 26.2     | 10      |
| Lobo        | Menguek II   | 79       | 24.1                   | 28.2     | 9       |
| Lobo        | Menvoa       | 65       | 29.2                   | 45.3     | 10      |
| Lobo        | Nkongkadak   | 114      | 24.6                   | 43.9     | 6       |
| Lobo        | Ovang        | 136      | 15.4                   | 20.0     | 15      |
| Lobo        | Tikong       | 123      | 28.5                   | 26.0     | 6       |
| Lobo        | Tsek         | 273      | 22.3                   | 25.1     | 11      |
| Mvoua       | Bilono I     | 190      | 18.9                   | 21.1     | 17      |
| Mvoua       | Bilono II    | 189      | 22.2                   | 17.0     | 10      |
| Mvoua       | Ekabita Tom  | 212      | 18.4                   | 12.6     | 18      |
| Mvoua       | Louma        | 393      | 19.3                   | 24.8     | 46      |
| Mvoua       | Mvoua        | 463      | 20.7                   | 23.8     | 44      |
| Mvoua       | Nkol Bega    | 317      | 15.5                   | 11.9     | 7       |
| Mvoua       | Ntsama       | 308      | 16.6                   | 23.9     | 31      |
| Mvoua       | Oban I       | 143      | 25.2                   | 21.7     | 15      |
| Mvoua       | Okoukouda    | 212      | 20.3                   | 17.7     | 7       |
| Mvoua       | Oyama        | 219      | 15.1                   | 21.3     | 25      |

Table S1 (Continued)

| Health area | Village        | No. Exam | Loa microfilaremia (%) | Ov16 (%) | No. AEs |
|-------------|----------------|----------|------------------------|----------|---------|
| Ngoya       | Beyidzolo      | 326      | 13.5                   | 16.2     | 2       |
| Ngoya       | Ebot           | 112      | 30.4                   | 16.7     | 4       |
| Ngoya       | Essong Aboudi  | 157      | 18.5                   | 11.7     | 2       |
| Ngoya       | Etoud          | 146      | 22.6                   | 23.4     | 8       |
| Ngoya       | Leboudi        | 590      | 7.7                    | 22.3     | 13      |
| Ngoya       | Metak          | 158      | 24.1                   | 16.3     | 2       |
| Ngoya       | Minsole        | 151      | 20.5                   | 11.3     | 17      |
| Ngoya       | Mintotomo      | 242      | 15.7                   | 16.2     | 5       |
| Ngoya       | Ngoya I        | 496      | 11.7                   | 13.9     | 10      |
| Ngoya       | Ngoya II       | 265      | 14.7                   | 10.2     | 8       |
| Ngoya       | Nkloessong     | 281      | 14.9                   | 16.1     | 8       |
| Ngoya       | Nklondom       | 121      | 25.6                   | 18.2     | 1       |
| Ngoya       | Nkolenyeng     | 81       | 13.6                   | 9.9      | 1       |
| Ngoya       | Nkolngon       | 319      | 13.2                   | 12.8     | 11      |
| Ngoya       | Nkong          | 119      | 18.5                   | 22.4     | 3       |
| Ngoya       | Nouma          | 380      | 20.4                   | 17.1     | 13      |
| Ngoya       | Yagassi        | 288      | 18.8                   | 13.0     | 27      |
| Ngoya       | Zamengoue      | 290      | 7.3                    | 10.0     | 16      |
| Nlong       | Akak           | 14       | 35.7                   | 42.9     | 0       |
| Nlong       | Ebenga         | 25       | 16.0                   | 40.0     | 0       |
| Nlong       | Ekoumtik       | 221      | 18.6                   | 32.9     | 12      |
| Nlong       | Elig Menyenke  | 87       | 18.4                   | 14.6     | 1       |
| Nlong       | Elig Vondo     | 91       | 18.7                   | 23.6     | 4       |
| Nlong       | Kelle          | 69       | 21.7                   | 32.4     | 1       |
| Nlong       | Mbama          | 91       | 16.5                   | 11.1     | 4       |
| Nlong       | Ngondzie       | 40       | 17.5                   | 22.5     | 4       |
| Nlong       | Ngoulmakong    | 90       | 21.1                   | 14.4     | 2       |
| Nlong       | Nklongock      | 95       | 30.5                   | 28.3     | 2       |
| Nlong       | Nkolbeyegle    | 53       | 13.2                   | 17.0     | 0       |
| Nlong       | Nkolget        | 40       | 27.5                   | 25.0     | 10      |
| Nlong       | Nlong          | 88       | 20.5                   | 17.9     | 2       |
| Okola       | Leboth         | 323      | 17.6                   | 25.1     | 30      |
| Okola       | Ledom I        | 292      | 13.4                   | 39.6     | 15      |
| Okola       | Ledom II       | 250      | 17.2                   | 33.5     | 13      |
| Okola       | Legom          | 394      | 11.7                   | 28.5     | 18      |
| Okola       | Lekie Assi     | 296      | 15.2                   | 25.4     | 12      |
| Okola       | Nkoldjobe      | 311      | 22.5                   | 23.9     | 12      |
| Okola       | Nkolessong     | 137      | 16.8                   | 30.9     | 0       |
| Okola       | Nkolfeb        | 147      | 21.8                   | 17.9     | 6       |
| Okola       | Nkolmekouma    | 126      | 17.5                   | 27.6     | 10      |
| Okola       | Nkolnyada      | 337      | 22.6                   | 23.0     | 17      |
| Okola       | Nkolodou       | 153      | 21.7                   | 30.7     | 5       |
| Okola       | Obak           | 346      | 22.5                   | 22.6     | 23      |
| Okola       | Oban II        | 293      | 21.5                   | 33.6     | 26      |
| Okola       | Okola – Centre | 345      | 6.1                    | 22.2     | 18      |

|       |                  |     |      |      |    |
|-------|------------------|-----|------|------|----|
| Okola | Okola – Camp Sap | 142 | 4.9  | 29.3 | 3  |
| Okola | Okola – Haoussa  | 464 | 11.4 | 24.0 | 23 |
| Okola | Okola – Nylon    | 238 | 14.3 | 23.6 | 15 |
| Okola | Okola – Zanzibar | 260 | 15.0 | 30.7 | 19 |

---

Figure S1. Principle of use and outputs of LoaScope.

**(1) Fingerprick**

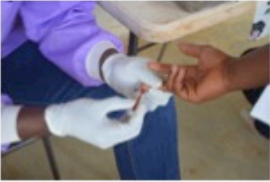

**(2) Blood analysis with the LoaScope**

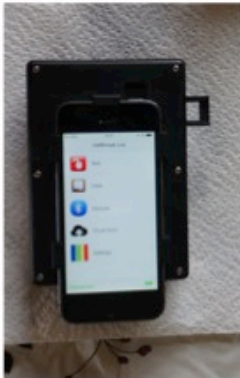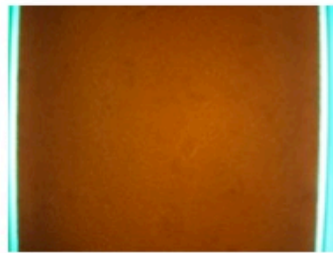

**(3) Result**

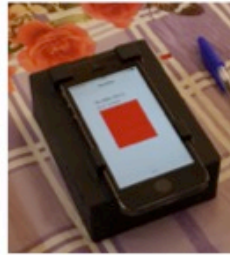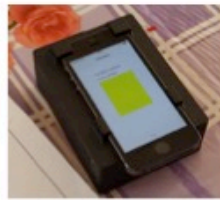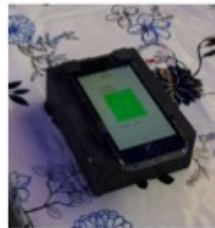

**(4) Treatment**

**>20,000 *Loa* mf/mL**  
Ivermectin not given  
Albendazole offered

**8,000-20,000 *Loa* mf/mL**  
Ivermectin given  
Warning that minor adverse events may occur

**<8,000 *Loa* mf/mL**  
Ivermectin given  
No warning

Figure S2. Location of the 92 villages included in the TaNT survey with Ov16 prevalence.

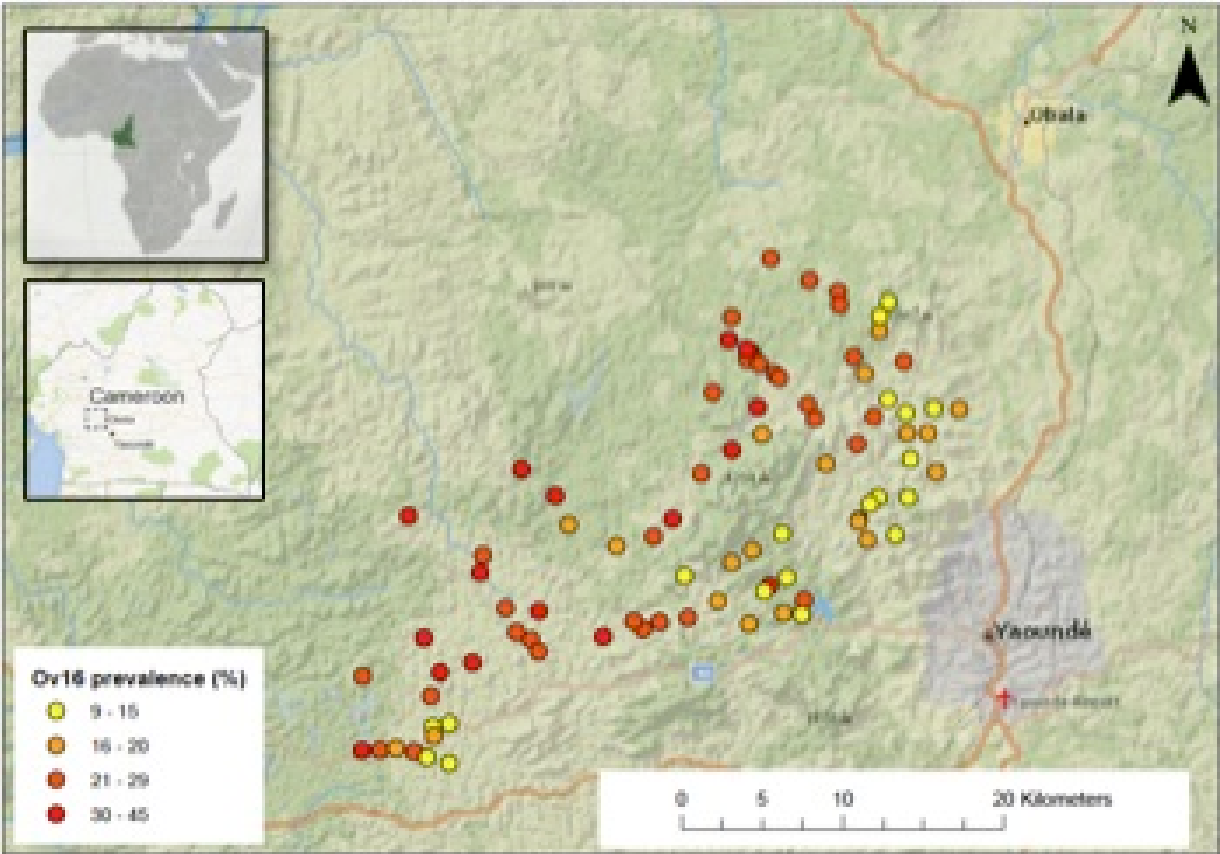

Figure S3. Timeline of the Test and not Treat strategy during year 2015

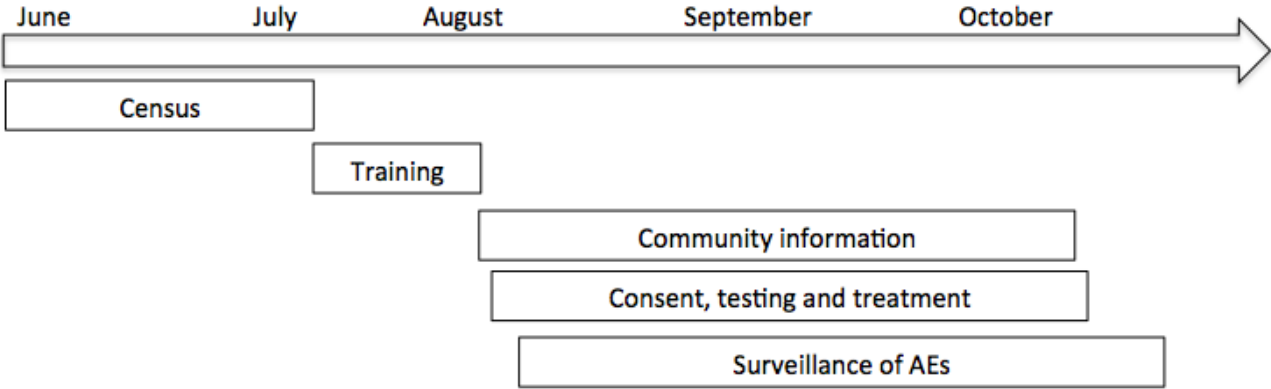

**Figure S4.** Individual card given to all participants

|                                                                                                     |                                                                                     |
|-----------------------------------------------------------------------------------------------------|-------------------------------------------------------------------------------------|
| Date : _____                                                                                        | Village : _____                                                                     |
| N° TNT- _____                                                                                       | N° ménage _____                                                                     |
| Nom : _____                                                                                         | _____                                                                               |
| Prénom : _____                                                                                      | Age _____ ans                                                                       |
| Résultat LoaScope                                                                                   | _____ mf/mL                                                                         |
| Nb cp de Mectizan reçus                                                                             | _____                                                                               |
| Signature du participant                                                                            | <div style="border: 1px solid black; height: 40px; width: 100%;"></div>             |
| Une équipe de surveillance passera<br>1, 2, 3, et 6 jours après le traitement<br>dans votre village | En cas de réaction au<br>traitement, revenez avec<br>votre carte individuelle       |
| Tél. de l'équipe:                                                                                   |  |
|                                                                                                     | <b>696 50 51 85</b>                                                                 |



Figure S5. Standardized form to record all adverse events following ivermectin treatment

**« Test and treat » - Effets secondaires** Date du jour : \_\_\_\_/\_\_\_\_/2015

Première visite  Visite de suivi  Effectuée par (initiales) : \_\_\_\_\_

Date du traitement par Mectizan \_\_\_\_/\_\_\_\_/2015 Village \_\_\_\_\_

N° TNT- \_\_\_\_\_ Numéro de ménage : \_\_\_\_\_ LoaScope J0: \_\_\_\_\_

Nom et prénom \_\_\_\_\_ Sexe \_\_\_\_ Age \_\_\_\_ (ans)

Patient vu au point de consultation  au domicile  alité

Interrogatoire : patient  entourage

Plaintes spontanées (noter heure de début, écrire au verso si nécessaire: \_\_\_\_\_)

---

**Questionnaire (entourer chaque réponse, ajouter + après si marqué)**

Asthénie: Oui / Non Anorexie: Oui / Non Céphalées: Oui / Non Lombalgies: Oui / Non

Autres arthralgies: Oui / Non Myalgies: Oui / Non Prurit: Oui / Non

Troubles visuels: Oui / Non si oui, préciser \_\_\_\_\_

Troubles auditifs, vertiges: Oui / Non si oui, préciser \_\_\_\_\_

Antécédents médicaux: Oui / Non si oui, préciser \_\_\_\_\_

Carnet vu : Oui / Non

Traitement antérieur par IVM: Oui / Non / NSP si oui, date(s) : \_\_\_\_\_

**Examen systématique**

Rash: Oui / Non Œdèmes: Oui / Non Adénites: Oui / Non (préciser localisations au verso)

Hémorragie conjonctive palpébrale: Oui / Non, Précisions: \_\_\_\_\_ Photo faite: Oui / Non

Difficultés à marcher: Oui / Non si oui, par: Douleur / Fatigue

Difficultés à se lever d'une chaise: Oui / Non si oui, préciser cause \_\_\_\_\_

Mutisme: Oui / Non Obnubilation: Oui / Non Agitation: Oui / Non

Troubles de la conscience: Oui / Non si oui, Glasgow mesuré : Oui / Non Résultat: \_\_\_\_/15

Incontinence urinaire: Oui / Non autres troubles neuro : Oui / Non (si oui, préciser au verso)

Autres troubles (digestifs, etc.): Oui / Non si oui, préciser: \_\_\_\_\_

Karnofsky (%): \_\_\_\_ Température: \_\_\_\_°C TA couché: \_\_\_\_/\_\_\_\_ TA debout/assis: \_\_\_\_/\_\_\_\_

**Examens supplémentaires nécessaires (T° ≥ 38/5° ou indice Karnofsky ≤ 70%):** Oui / Non

Si oui, remplir une fiche « Examens supplémentaires »

**Traitement en cours:** paracétamol / ibuprofène / chlorpheniramine / multivit. / quinine / SRO /  
 artemether / amoxicilline / doxycycline / sulfate ferreux / hydroxyde d'Alu / métronidazole

**Traitement donné ce jour:** paracétamol / ibuprofène / chlorpheniramine / multivit. / quinine / SRO /  
 artemether / amoxicilline / doxycycline / sulfate ferreux / hydroxyde d'Alu / métronidazole

**Hospitalisation:** Oui / Non Si oui, préciser : \_\_\_\_\_

A remplir par l'opérateur de saisie: Informations au verso vérifiées  Fiche saisie

Figure S6. Number of excluded individuals in each village, classified by cause of exclusion (high *Loa* microfilaremia or other cause)

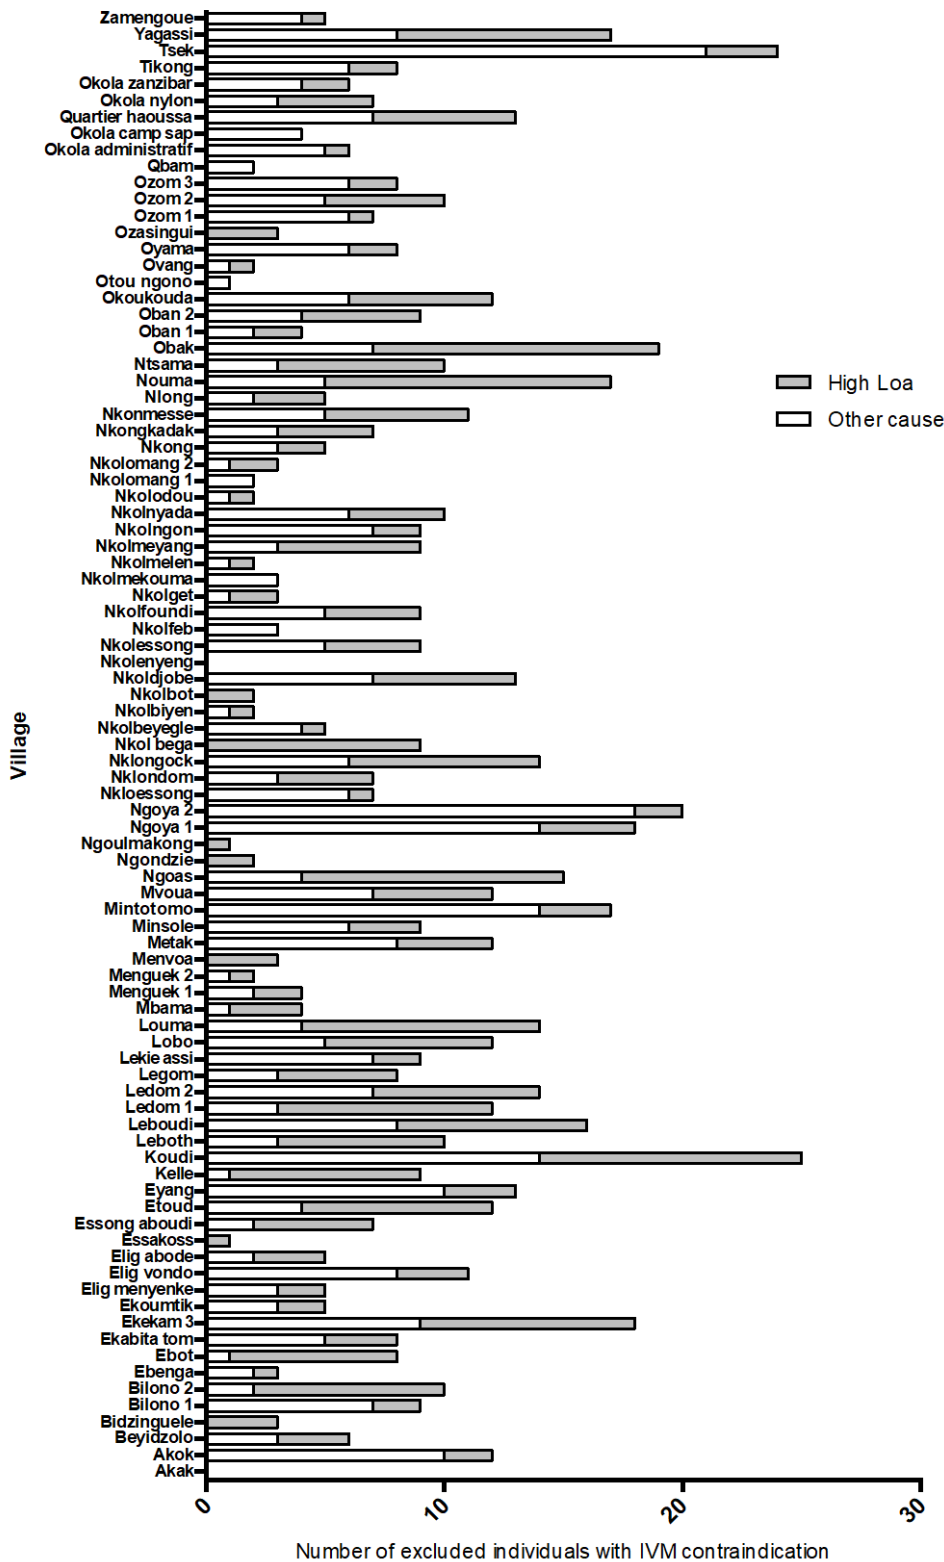

Movie S1. Link to a movie of the process from introduction of the capillary to the result.

<https://www.dropbox.com/s/mctgg4i9ibz3768/LoaScope%20process.MP4?dl=0>

## Supplementary Methods: announcement of the TaNT campaign to the population

During a house to house census, the objectives and study design were explained informally to the head of each household, specifically highlighting the benefits of ivermectin treatment at the individual level (effect on filarial and intestinal worms, clinical improvement) and at the community level (impact on transmission) along with the potential risks of ivermectin-based MDA. During the week prior to the TaNT campaign, village authorities provided the population with logistical information, and flyers (available on demand) explaining the TaNT strategy were distributed to all households.
